# Supplementary material for: Identification of Independent and Shared Metabolic Responses to High-Fiber and Antibiotic Treatments in Fecal Metabolome of Grow–Finish Pigs
Source: MDPI journal article supplement (doi:10.3390/metabo12080686), 2022-07-26
Supplement: s1 [file s1]

# Identification of Independent and Shared Metabolic Responses to High-Fiber and Antibiotic Treatments in Fecal Metabolome of Grow–Finish Pigs

Yuan-Tai Hung <sup>1,†</sup>, Yajian Song <sup>2,†</sup>, Qiong Hu <sup>3</sup>, Richard J. Faris <sup>3</sup>, Juanjuan Guo <sup>2</sup>, Yiwei Ma <sup>2</sup>, Milena Saqui-Salces <sup>1</sup>, Pedro E. Urriola <sup>1,4</sup>, Gerald C. Shurson <sup>1</sup> and Chi Chen <sup>1,2,\*</sup>

<sup>1</sup> Department of Animal Science, University of Minnesota, 1988 Fitch Ave, Saint Paul, MN 55108, USA; hungx121@umn.edu (Y.-T.H.); msaquisa@umn.edu (M.S.-S.); urrio001@umn.edu (P.E.U.); shurs001@umn.edu (G.C.S.)

<sup>2</sup> Department of Food Science and Nutrition, University of Minnesota, 1334 Eckles Ave, Saint Paul, MN 55108, USA; songyajian@tust.edu.cn (Y.S.); gjjfst15@163.com (J.G.); maxxx792@umn.edu (Y.M.)

<sup>3</sup> Cargill Animal Nutrition, 10383 165th Ave NW, Elk River, MN 55330, USA; qiong\_hu@cargill.com (Q.H.); richard\_faris@cargill.com (R.J.F.)

<sup>4</sup> Department of Veterinary Population Medicine, University of Minnesota, 1365 Gortner Ave, Saint Paul, MN 55108, USA

\* Correspondence: chichen@umn.edu; Tel.: +1-612-624-7704; Fax: +1-612-625-5272

† These authors contributed equally to this work.

## SUPPORTING INFORMATION

**Table S1.** Sources of chemicals and reagents used in chemical analysis, LC-MS analysis, structural confirmation and quantification.

| <b>Chemicals and reagents</b>                                                                                                                                                                                                                    | <b>Vendor</b>                                   |
|--------------------------------------------------------------------------------------------------------------------------------------------------------------------------------------------------------------------------------------------------|-------------------------------------------------|
| Taurocholic acid, Pentadecanoic acid                                                                                                                                                                                                             | Acros Organics (Morris Plains, NJ, USA)         |
| <i>p</i> -Chloro-L-phenylalanine                                                                                                                                                                                                                 | Alexis Biochemicals (San Diego, CA, USA)        |
| Heptadecanoic acid, 2-Hydrazinoquinoline (HQ), Hyodeoxycholic acid, Triphenylphosphine (TPP)                                                                                                                                                     | Alfa Aesar (Ward Hill, MA, USA)                 |
| Methanol (LC-MS grade)                                                                                                                                                                                                                           | Avantor performance materials (Radnor, PA, USA) |
| Bacitracin                                                                                                                                                                                                                                       | Alpharma Inc. (Bridgewater, NJ, USA)            |
| Acetonitrile (LC-MS grade), Ammonium formate, Formic acid (LC-MS grade), Water (LC-MS grade)                                                                                                                                                     | Fisher Scientific (Houston, TX, USA)            |
| <i>p</i> -Cresol                                                                                                                                                                                                                                 | Fluka (Buchs, Switzerland)                      |
| 2-2'-Dipyridyl disulfide (DPDS)                                                                                                                                                                                                                  | MP Biomedicals, LLC (Irvine, CA, USA)           |
| Fatty acids standards (C4-C22)                                                                                                                                                                                                                   | Nu-Chek Prep, Inc. (Elysian, MN, USA)           |
| Amino acid mixture (acidic), Amino acid mixture (basic), Dansyl chloride (DC), Deoxycholate, 3-Indoxyl sulfate potassium, Lithocholate, Phenylacetic acid, Sodium deoxycholate, Sodium taurochenodeoxycholate, Taurodeoxycholic acid sodium salt | Sigma-Aldrich (St. Louis, MO, USA)              |
| Lauroylglycine                                                                                                                                                                                                                                   | Santa Cruz Biotech (Santa Cruz, CA, USA)        |

**Table S2.** Ingredient and nutrient composition of experimental diets (as-fed basis) <sup>1</sup>

| Fiber<br>Phase                      | Low   |       |       |       | High  |       |       |       |
|-------------------------------------|-------|-------|-------|-------|-------|-------|-------|-------|
|                                     | 1     | 2     | 3     | 4     | 1     | 2     | 3     | 4     |
| <i>Ingredients, %</i>               |       |       |       |       |       |       |       |       |
| Corn <sup>2</sup>                   | 61.58 | 64.90 | 63.27 | 67.72 | 49.93 | 45.51 | 40.61 | 36.98 |
| Wheat middlings                     | 10.00 | 10.00 | 15.00 | 15.00 | 25.00 | 35.00 | 45.00 | 55.00 |
| Soybean meal                        | 24.79 | 21.75 | 19.00 | 14.20 | 21.38 | 16.20 | 11.80 | 5.18  |
| Poultry fat                         | 1.03  | 0.71  | 0.75  | 0.87  | 1.03  | 0.71  | 0.75  | 0.87  |
| Calcium carbonate                   | 0.92  | 0.90  | 0.79  | 0.71  | 1.19  | 1.17  | 0.84  | 0.77  |
| Monocalcium phosphate               | 0.71  | 0.58  | 0.38  | 0.43  | 0.56  | 0.33  | 0.19  | 0.18  |
| Salt                                | 0.43  | 0.43  | 0.59  | 0.42  | 0.43  | 0.43  | 0.59  | 0.42  |
| Titanium dioxide                    | -     | 0.20  | -     | 0.20  | -     | 0.20  | -     | 0.20  |
| Sodium carbonate                    | -     | -     | -     | 0.02  | -     | -     | -     | 0.00  |
| Vitamin/Mineral premix <sup>3</sup> | 0.11  | 0.11  | 0.11  | 0.11  | 0.11  | 0.11  | 0.11  | 0.11  |
| DL-Methionine                       | 0.06  | 0.05  | -     | 0.01  | 0.04  | 0.02  | -     | 0.00  |
| L-lysine HCl                        | 0.28  | 0.28  | 0.11  | 0.26  | 0.26  | 0.25  | 0.12  | 0.25  |
| Threonine                           | 0.09  | 0.09  | 0.00  | 0.06  | 0.08  | 0.07  | 0.00  | 0.06  |
| Total                               | 100   | 100   | 100   | 100   | 100   | 100   | 100   | 100   |
| <i>Calculated composition</i>       |       |       |       |       |       |       |       |       |
| Dry matter, %                       | 87.98 | 87.96 | 87.88 | 88.10 | 87.97 | 87.93 | 87.92 | 88.00 |
| Net Energy, kcal/kg                 | 2400  | 2400  | 2400  | 2440  | 2289  | 2219  | 2202  | 2169  |
| Crude protein, %                    | 18.72 | 17.54 | 16.39 | 14.94 | 18.71 | 17.60 | 16.39 | 15.00 |
| Standardized ileal digestible Lys   | 1.07  | 1.00  | 0.80  | 0.80  | 1.02  | 0.92  | 0.74  | 0.71  |
| Standardized ileal digestible Met   | 0.33  | 0.30  | 0.24  | 0.24  | 0.30  | 0.27  | 0.23  | 0.21  |
| Standardized ileal digestible M+C   | 0.60  | 0.56  | 0.49  | 0.47  | 0.57  | 0.54  | 0.50  | 0.47  |
| Standardized ileal digestible Thr   | 0.66  | 0.61  | 0.50  | 0.50  | 0.63  | 0.57  | 0.46  | 0.44  |
| Crude fat, %                        | 3.53  | 3.27  | 3.67  | 3.69  | 3.58  | 3.36  | 3.79  | 3.94  |
| Crude ash, %                        | 4.91  | 4.79  | 4.46  | 4.15  | 5.35  | 5.36  | 4.90  | 4.78  |
| NDF, %                              | 9.49  | 9.50  | 10.95 | 10.54 | 12.99 | 15.35 | 17.67 | 19.71 |
| Total Ca, %                         | 0.61  | 0.57  | 0.51  | 0.47  | 0.70  | 0.65  | 0.51  | 0.47  |
| Digestible P, %                     | 0.23  | 0.20  | 0.16  | 0.16  | 0.22  | 0.19  | 0.15  | 0.14  |

<sup>1</sup>In each phase of feeding, Bacitracin and fiber are two factors in the 2 × 2 factorial design of 4 diets, including Bacitracin free-low fiber (AF+LF) diet; Bacitracin free-high fiber (AF+HF) diet; Bacitracin-low fiber (AB+LF) diet; Bacitracin-high fiber (AB+HF) diet.

<sup>2</sup>Bacitracin (25 mg/kg) added at expense of corn

<sup>3</sup>Premix supplied the following nutrients per kilogram of diet: 60 IU Vitamin E Equivalent, 10,000 IU Vitamin A, 1,600 Vitamin D3 Equivalent, 1.5 mg Thiamine, 8 mg Riboflavin, 50 mg Niacin, 60 mg Pantothenic Acid, 2 mg Pyridoxine, 1.1 mg Folic Acid, 35 µg Vitamin B12, 3.5 mg Menadione, 75 µg Ethoxyquin, 18 mg Copper, 110 mg Iron, 0.7 mg Iodine, 50 mg Manganese, 110 mg Zinc, 0.3 mg Selenium
